# Supplementary material
Source: MDPI journal article supplement (https://www.mdpi.com/2075-1702/12/5/284)
Supplement: s1 [file s1]

Archive with 2 entries (2 files):
- OLEBOT_supplementary_video.mp4
- Supplementary Materials.pdf
